# Supplementary material for: Sustaining genetic diversity in an imperiled pelagophilic fish despite genetic drift
Source: Research Square preprint supplement (doi:10.21203/rs.3.rs-7863499/v1), 2025-10-22
Supplement: Supplementary file 1 [file 0e9efec3372baaccbdea5af4.docx]

**Supplementary material for:**

**Sustaining genetic diversity in an imperiled pelagophilic fish despite genetic drift**

**Caeiro-Dias, G1*, Cameron, A1,2, Turner, T1, Osborne, M1**

**1 Department of Biology and Museum of Southwestern Biology, MSC 03-2020, University of New Mexico, Albuquerque, New Mexico, 87131, USA.**

**2 Arizona Game and Fish Department, Phoenix, Arizona 85086**

*** Corresponding author; e-mail:** [**gcaeirodias@unm.edu**](mailto:gcaeirodias@unm.edu)

**Table of Contents:**

| **Tables** | Page 2 |
| --- | --- |
| **Table S1** | Page 2 |
| **Table S2** | Page 2 |
| **Table S3** | Page 2 |
| **Table S4** | Page 2 |
| **Table S5** | Page 3 |
| **Table S6** | Page 3 |
| **Table S7** | Page 3 |
| **Figures** | Page 4 |
| **Figure S1** | Page 4 |
| **Figure S2** | Page 4 |

**Tables**

**Table S1 –** Pairwise Wilcoxon test p-values for allelic richness (AR) between temporal collections estimated with NM-TX dataset (1,908 loci), after Bonferroni correction for multiple comparisons. Significant differences (p < 0.05) are highlighted with solid cell limits.

|  | **NM 2015** | **NM 2016** | **NM 2017** | **TX 2017** | **NM 2018** | **NM 2019** |
| --- | --- | --- | --- | --- | --- | --- |
| **NM 2016** | 1 | - | - | - | - | - |
| **NM 2017** | 1 | 1 | - | - | - | - |
| **TX 2017** | 4x10-7 | 5.2x10-11 | 2.5x10-7 | - | - | - |
| **NM 2018** | 1.4x10-4 | 1.5x10-4 | 0.024 | 1 | - | - |
| **NM 2019** | 1 | 1 | 1 | 3.2x10-11 | 2.9x10-5 | - |
| **NM 2020** | 1 | 1 | 1 | 4.8x10-11 | 6.5x10-5 | 1 |

**Table S2 –** Pairwise Wilcoxon test p-values for allelic richness (AR) between temporal collections estimated with NM dataset (2,804 loci), after Bonferroni correction for multiple comparisons. Significant differences (p < 0.05) are highlighted with solid cell limits.

|  | **NM 2015** | **NM 2016** | **NM 2017** | **NM 2018** | **NM 2019** |
| --- | --- | --- | --- | --- | --- |
| **NM 2016** | 1 | - | - | - | - |
| **NM 2017** | 1 | 1 | - | - | - |
| **NM 2018** | 1.1x10-7 | 3.7x10-8 | 1.3x10-4 | - | - |
| **NM 2019** | 1 | 1 | 1 | 6.1x10-10 | - |
| **NM 2020** | 1 | 1 | 1 | 1.8x10-8 | 1 |

**Table S3 –** Pairwise Wilcoxon test p-values for observed heterozygosity (HO) between temporal collections estimated with NM dataset (2,804 loci), after Bonferroni correction for multiple comparisons. Significant differences (p < 0.05) are highlighted with solid cell limits.

|  | **NM 2015** | **NM 2016** | **NM 2017** | **NM 2018** | **NM 2019** |
| --- | --- | --- | --- | --- | --- |
| **NM 2016** | 1 | - | - | - | - |
| **NM 2017** | 1 | 1 | - | - | - |
| **NM 2018** | 1 | 0.58 | 1 | - | - |
| **NM 2019** | 1 | 1 | 1 | 0.51 | - |
| **NM 2020** | 0.41 | 1 | 1 | 0.005 | 1 |

**Table S4 –** Pairwise Wilcoxon test p-values for inbreeding coefficient (FIS) between temporal collections estimated with NM-TX dataset (1,908 loci), after Bonferroni correction for multiple comparisons. Significant differences (p < 0.05) are highlighted with solid cell limits.

|  | **NM 2015** | **NM 2016** | **NM 2017** | **TX 2017** | **NM 2018** | **NM 2019** |
| --- | --- | --- | --- | --- | --- | --- |
| **NM 2016** | 0.676 | - | - | - | - | - |
| **NM 2017** | 5.9x10-12 | 9.7x10-7 | - | - | - | - |
| **TX 2017** | 1.9x10-96 | 2.7x10-85 | 3.8x10-53 | - | - | - |
| **NM 2018** | 2.2x10-38 | 2.5x10-32 | 3.4x10-14 | 1.4x10-14 | - | - |
| **NM 2019** | 1 | 1 | 1.7x10-9 | 2.0x10-98 | 1.1x10-38 | - |
| **NM 2020** | 2.6x10-4 | 0.267 | 0.006 | 7.9x10-79 | 2.0x10-25 | 0.008 |

**Table S5 –** Pairwise Wilcoxon test p-values for inbreeding coefficient (FIS) between temporal collections estimated with NM dataset (2,804 loci), after Bonferroni correction for multiple comparisons. Significant differences (p < 0.05) are highlighted with solid cell limits.

|  | **NM 2015** | **NM 2016** | **NM 2017** | **NM 2018** | **NM 2019** |
| --- | --- | --- | --- | --- | --- |
| **NM 2016** | 0.131 | - | - | - | - |
| **NM 2017** | 1.1x10-15 | 4.2x10-8 | - | - | - |
| **NM 2018** | 2.6x10-56 | 2.1x10-46 | 1.8x10-21 | - | - |
| **NM 2019** | 1 | 1 | 7.0x10-12 | 1.6x10-55 | - |
| **NM 2020** | 2.9x10-7 | 0.025 | 0.008 | 4.2 x10-35 | 9.5 x10-5 |

**Table S6 –** Linkage disequilibrium effective population size (LD Ne) estimated with TX-NM (1,908 loci) and NM (2,804 loci) datasets using the method from Hill (1981) and associated parametric 95% confidence intervals (CIs) for each temporal collection. Note that estimated LD Ne refers to the parental population that originated the population from where the samples used to estimate LD Ne was collected.

| **Sample** | **Parental generation** | **Estimate** | **Lower 95% CI** | **Upper 95% CI** | **Dataset** |
| --- | --- | --- | --- | --- | --- |
| NM 2015 | NM 2014 | 2,112.7 | 1,688 | 2,820.9 | TX-NM |
| NM 2016 | NM 2015 | 4,042.1 | 2,555.2 | 9,637.8 | TX-NM |
| NM 2017 | NM 2016 | ∞ | 0 | ∞ | TX-NM |
| TX 2017 | TX 2016 | ∞ | 0 | ∞ | TX-NM |
| NM 2018 | NM 2017 | ∞ | 0 | ∞ | TX-NM |
| NM 2019 | NM 2018 | 152.4 | 150 | 154.8 | TX-NM |
| NM 2020 | NM 2019 | 7,988.7 | 4,596.5 | 3,0319.3 | TX-NM |
| NM 2015 | NM 2014 | 2,255.3 | 1,917.5 | 2,736.5 | NM |
| NM 2016 | NM 2015 | 3,666.2 | 2,726.7 | 5,590.7 | NM |
| NM 2017 | NM 2016 | ∞ | 0 | ∞ | NM |
| NM 2018 | NM 2017 | ∞ | 0 | ∞ | NM |
| NM 2019 | NM 2018 | 154 | 152.4 | 155.6 | NM |
| NM 2020 | NM 2019 | 12,199.9 | 7,012.3 | 46,698.6 | NM |

**Table S7 –** Variance effective population size (NeV) estimated from consecutive years with both TX-NM (1,908 loci) and NM (2,804 loci) datasets and associated parametric 95% confidence intervals (CIs) using the temporal method of Nei and Tajima (1981).

| **Consecutive years** | **Estimate** | **Lower 95% CI** | **Upper 95% CI** | **Dataset** |
| --- | --- | --- | --- | --- |
| NM 2015-2016 | 125.2 | 88.2 | 205.9 | TX-NM |
| NM 2016-2017 | 145.4 | 95.7 | 282.3 | TX-NM |
| NM 2017-2018 | ∞ | 140.3 | ∞ | TX-NM |
| NM 2018-2019 | 179.5 | 80.9 | ∞ | TX-NM |
| NM 2019-2020 | 169.4 | 117.5 | 288 | TX-NM |
| NM 2015-2016 | 100.2 | 78.5 | 135.9 | NM |
| NM 2016-2017 | 83 | 64.1 | 115.1 | NM |
| NM 2017-2018 | 350.5 | 196 | 1,373.5 | NM |
| NM 2018-2019 | 94.6 | 61.9 | 188.8 | NM |
| NM 2019-2020 | 136.7 | 105.8 | 188.8 | NM |

**Figures**

**Figure S1 –** Box plot depicting the distribution, mean, and median of missing data across the 2,804 loci for each temporal collection. Dots represent distribution outliers.

**Figure S2 –** Allele frequencies variation across time for the only two loci with allele frequency difference (AFD) of 0.1 or higher between all consecutive years. Temporal variation does not follow any temporal trend.
